# Supplementary material for: Evaluation of the binding of oxovanadium(iv) to human serum albumin
Source: Royal Society of Chemistry journal article supplement (doi:10.1039/c2dt12193j), 2012-01-01
Supplement: c2dt12193j.pdf [file c2dt12193j.pdf]

## Electronic Supplemental Information

Isabel Correia, Tamás Jakusch, Enoch Cobbinna, Sameena Mehtab, Isabel Tomaz, Nóra Nagy, Antal Rockenbauer, João Costa Pessoa and Tamás Kiss

### Evaluation of the binding of oxovanadium(IV) to Human Serum Albumin

#### ESI 1 – Spectroscopic studies with fatted HSA and $V^{IV}O$

Figure ESI1-1 shows the CD spectra obtained in experiments containing fatted and defatted HSA ( $630 \mu\text{M}$ ) and  $V^{IV}O$ . These illustrate that the presence of fatty acids decrease the intensity of the CD spectra, probably due to disruption of the MBS site, where  $V^{IV}O$  binds.

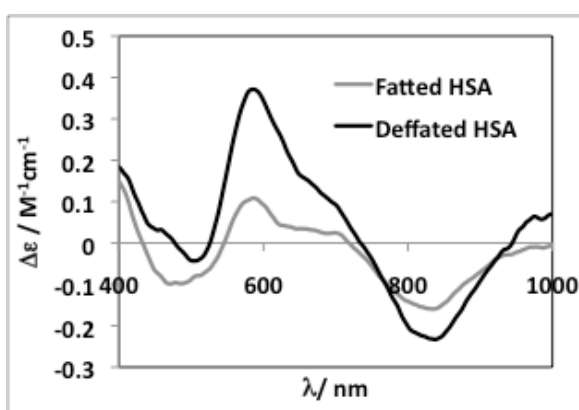

**Figure ESI1-1** – CD spectra in the visible range of solutions containing  $0.630 \mu\text{M}$  of HSA and  $V^{IV}O(\text{ClO}_4)_2$  with a ratio of HSA :  $V^{IV}O = 1 : 5$ .

#### ESI 2 – $Zn^{II}$ – $V^{IV}O$ competition studies for HSA binding

Figures ESI2-1 and ESI2-1 show the EPR spectra measured in the competition studies with  $Zn^{II}$ , with both fatted and defatted HSA, a HSA :  $V^{IV}O$  ratio of  $1 : 5$  and different amounts of  $Zn^{II}$ .

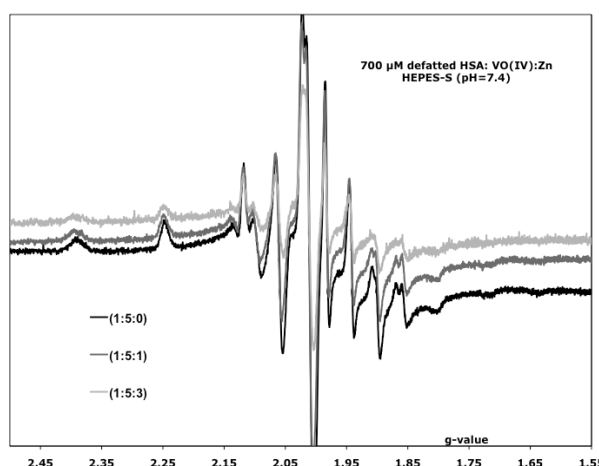

**Figure ESI2-1** – First derivative X-band EPR spectra of solutions containing  $0.700 \mu\text{M}$  of defatted HSA; a HSA: $V^{IV}O$  ratio =  $1:5$  and increasing amounts of  $Zn^{II}$  indicated in the figure.

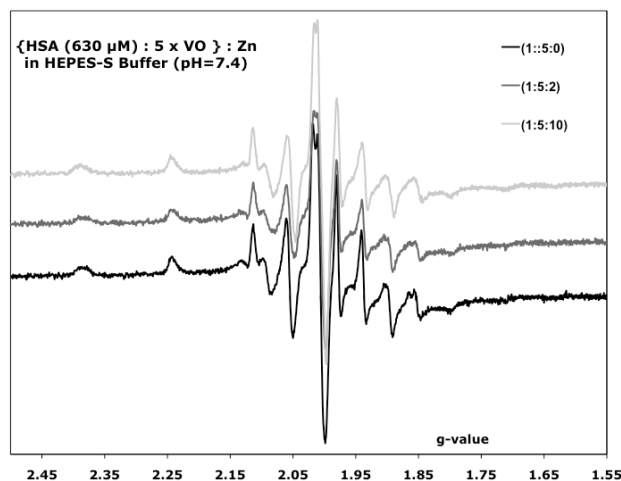

**Figure ESI2-2** – First derivative X-band EPR spectra of solutions containing 0.650  $\mu\text{M}$  of fatted HSA; a HSA: $\text{V}^{\text{IV}}\text{O}$  ratio = 1:5 and increasing amounts of  $\text{Zn}^{\text{II}}$  indicated in the figure.

The figures show that in both cases there is a small decrease in the EPR signal intensity after addition of  $\text{Zn}^{\text{II}}$ , but a significant amount of  $\text{V}^{\text{IV}}\text{O}$  remains bound to the protein.

### ESI 3 – The interaction of HSA with $\text{Cu}^{\text{II}}$

Although several authors have studied the HSA- $\text{Cu}^{\text{II}}$  system we decided to reevaluate it by CD and EPR. Figure ESI3-1 shows the CD spectra measured for solutions containing 0.500  $\mu\text{M}$  of HSA and different amounts of  $\text{Cu}^{\text{II}}$  at pH = 7.4 and the variation of the CD signal at several wavelengths.

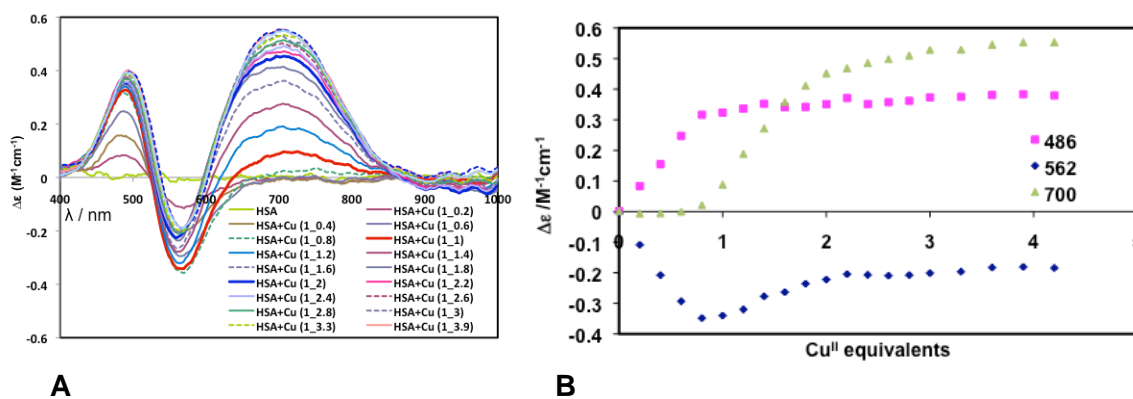

**Figure ESI3-1** – A) CD spectra in the visible range of solutions containing 0.500  $\mu\text{M}$  of HSA titrated with  $\text{Cu}^{\text{II}}$ . The molar ratios are indicated in the figure. B) Variation of the  $\Delta\epsilon$  at different  $\lambda$  indicated in the figure.

These spectra were used to calculate the individual spectra of the two species formed in the system:  $\text{Cu}^{\text{II}}$  bound to the ATCUN site and  $\text{Cu}^{\text{II}}$  bound to the MBS site, which are shown in Figure ESI3-2. These confirm the assumptions made by other authors concerning the binding of  $\text{Cu}^{\text{II}}$  to HSA and the assignment of the CD bands.

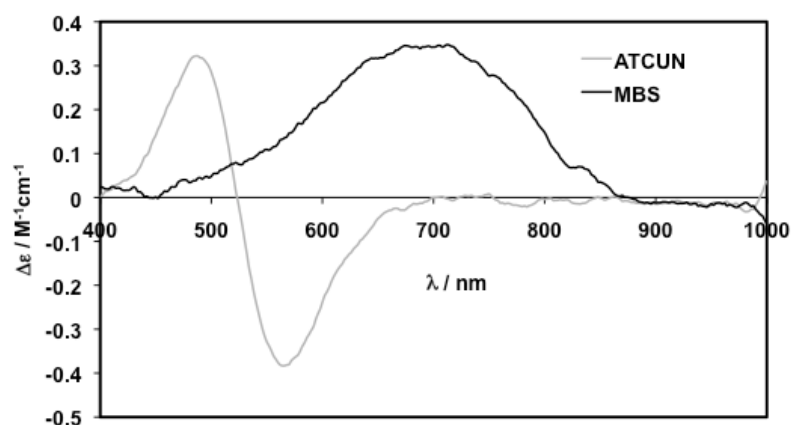

**Figure ESI3-2** – Calculated CD spectra in the visible range for Cu<sup>II</sup> coordinated at the ATCUN and MBS sites of HSA.

The X-band EPR spectra are depicted in figure ESI3-3 and show the presence of one species at HSA:Cu<sup>II</sup> ratio of 1, and two species for Cu<sup>II</sup>:HSA > 1. Super-hyperfine structure is detected in all spectra, due to the binding of HSA to the amide nitrogens of the ATCUN site.

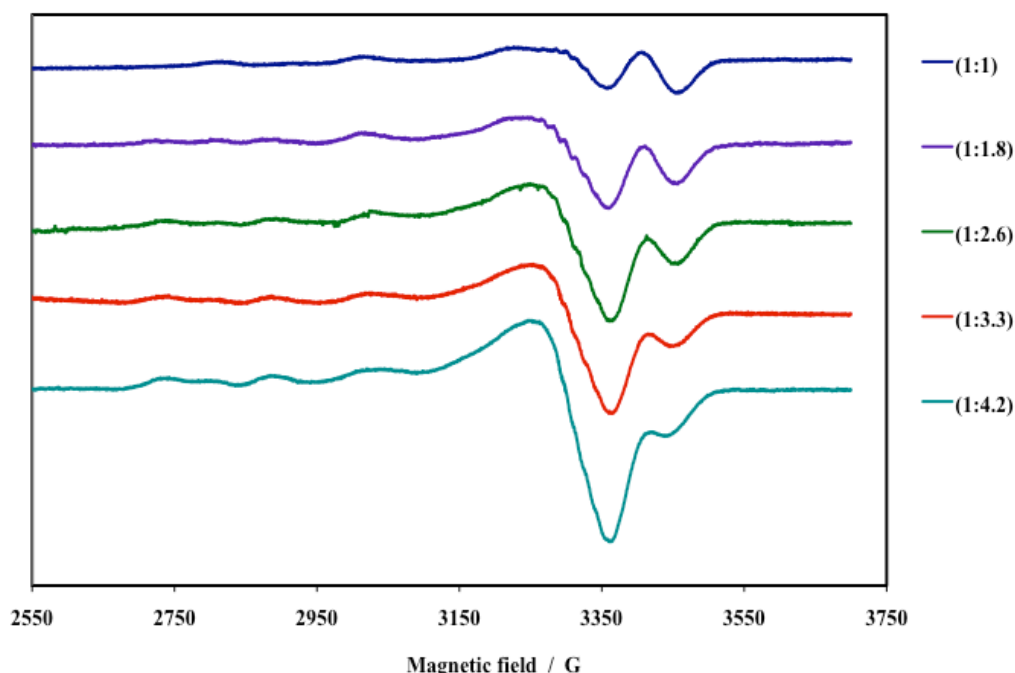

**Figure ESI3-3** First derivative X-band EPR spectra of solutions containing 0.500 μM of HSA and increasing amounts of Cu<sup>II</sup> indicated in the figure.

The changes observed in the X-band EPR spectra upon addition of V<sup>IV</sup>O to a solution containing HSA and Cu<sup>2+</sup> with a molar ratio of 1:2 are shown in figure ESI3-4. The individual calculated EPR spectra for Cu<sup>II</sup> coordinated at the ATCUN and MBS sites of HSA are depicted in Fig. ESI3-5.

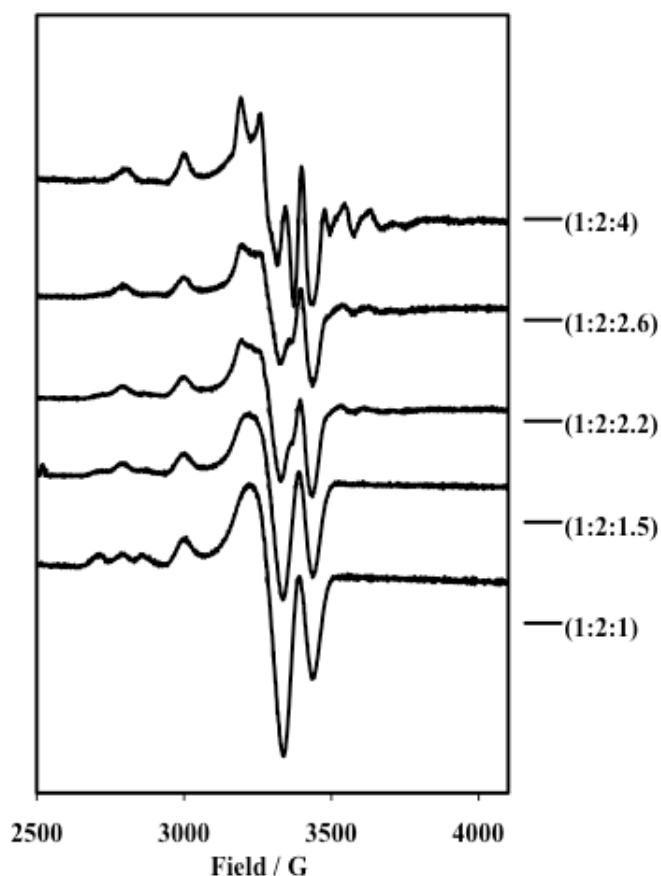

**Figure ESI3-4** – First derivative X-band EPR spectra of solutions containing 0.600  $\mu\text{M}$  of HSA and  $\text{Cu}^{2+}$ , with a HSA: $\text{Cu}^{\text{II}}$  ratio = 1:2, and upon adding increasing amounts of  $\text{V}^{\text{IV}}\text{O}$ , which are indicated in the figure.

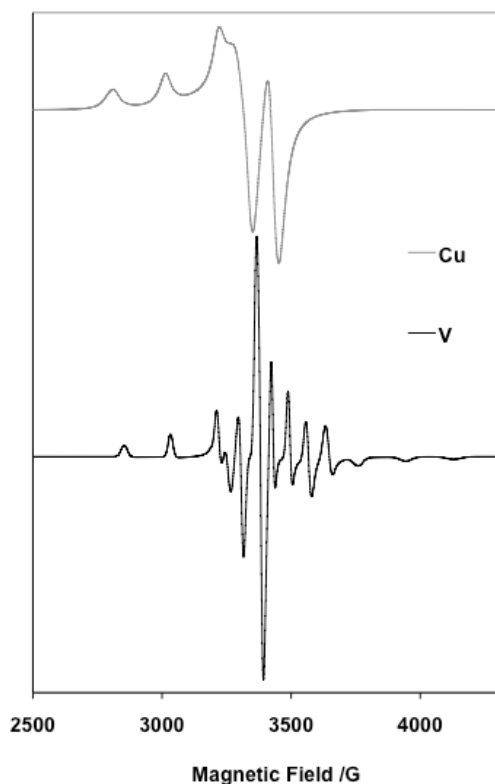

**Figure ESI3-5** – Individual calculated  $\text{Cu}^{\text{II}}$  and  $\text{V}^{\text{IV}}\text{O}$  EPR spectra for  $\text{Cu}^{\text{II}}$  and  $\text{V}^{\text{IV}}\text{O}$  bound to HSA.

ESI3-6 – Fitting of the X-band EPR spectra of solutions containing defatted HSA (0.50mM),  $V^{IV}O : HSA = 5 : 1$  and increasing amounts of  $Cu^{II}$

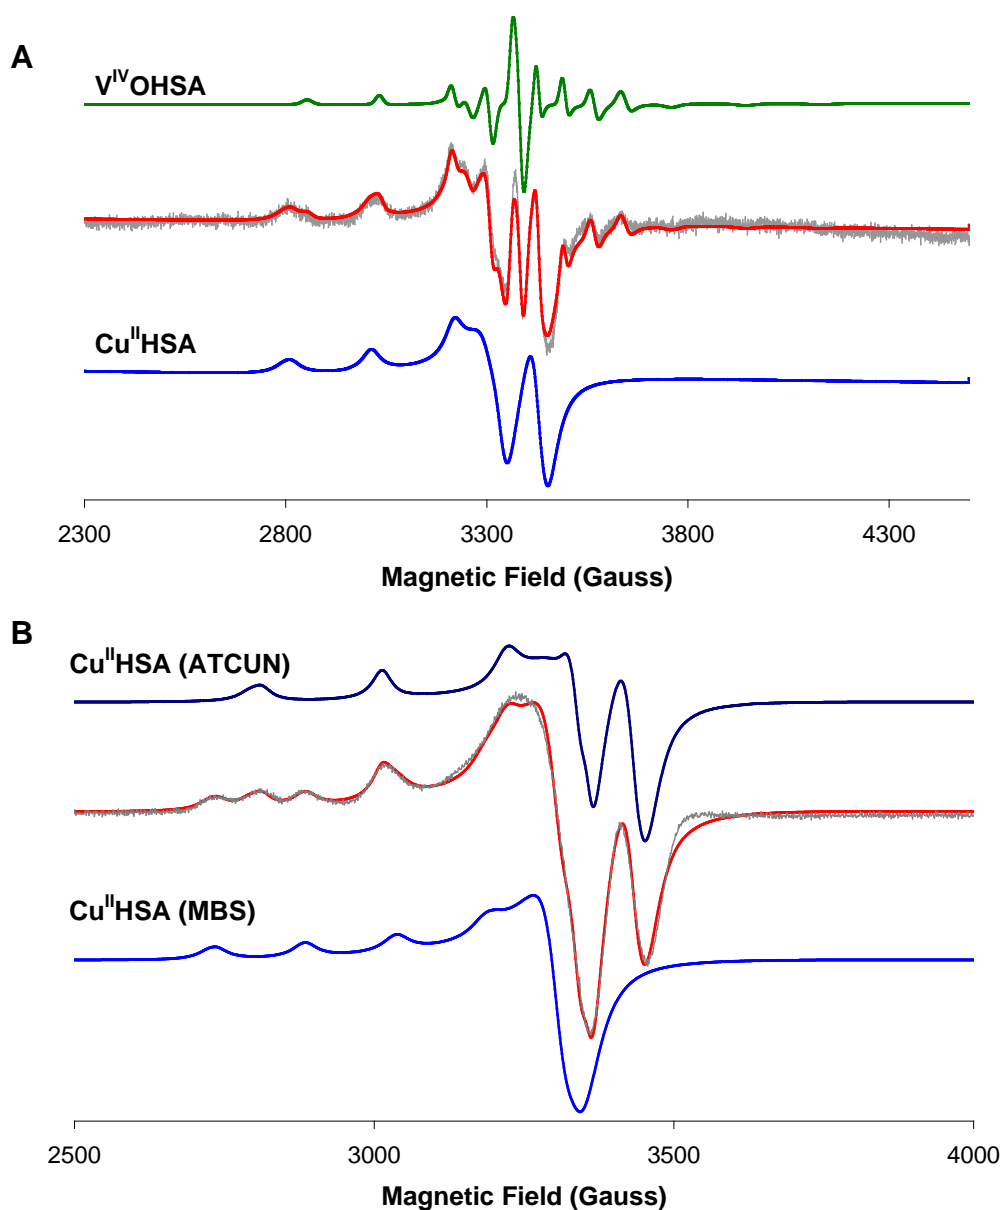

**Figure ESI3-6** shows two example of the fitting of the EPR spectra obtained in experiments containing defatted HSA (630 $\mu$ M) and  $V^{IV}O = 1 : 5$  and increasing amounts of  $Cu^{II}$ . The exact ratios (HSA :  $V^{IV}O$  :  $Cu^{II}$ ) **A** 1 : 5 : 1 **B** 1 : 5 : 2 At the ratio 1 : 5 : 1 (HSA :  $V^{IV}O$  :  $Cu^{II}$ ) only the  $V^{IV}OHSA$  and the  $Cu^{II}HSA$  (ATCUN) type spectra are observable.

At the ratio 1 : 5 : 2 (HSA :  $V^{IV}O$  :  $Cu^{II}$ ) no  $V^{IV}OHSA$  type spectrum is observable. The ratio of the double integrated spectra of  $Cu^{II}HSA$  (ATCUN) and  $Cu^{II}HSA$  (MBS) is  $\sim 1 : 1$ .

Figure ESI3-7 depicts the CD spectrum in the visible range of a solution containing HSA, with HSA: $V^{IV}O = 1:5$  at pH = 7.4, and the changes observed when  $Cu^{II}$  is added to this solution. The figure shows the CD spectra upon additions up to 1 mol equivalent of  $Cu^{II}$ .

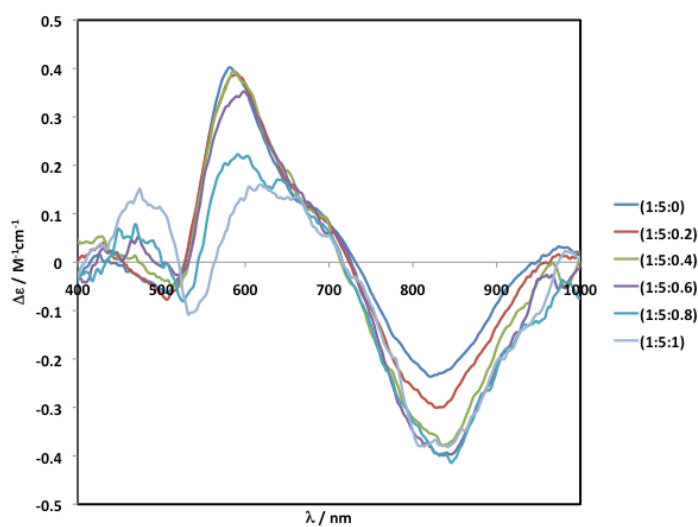

**Figure ESI3-7** –CD spectra in the visible range of solutions containing 0.500  $\mu M$  of HSA, HSA: $V^{IV}O = 1:5$  and upon adding  $Cu^{2+}$  ( $Cu^{II}$  from 0 to 1 mol equivalents vs. HSA).

## ESI4 – Ternary systems

The X-band EPR spectra of solutions containing HSA,  $V^{IV}O$  and maltol are depicted in figure ESI4-1. It is shown that upon adding maltol there is a strong increase in the EPR signal, corroborating our assumption that a significant part of the  $V^{IV}O$  bound to HSA is present as EPR silent species. Upon addition of maltol, and its coordination to  $V^{IV}O$  bound to HSA, a monomeric species is produced, with a much stronger EPR signal.

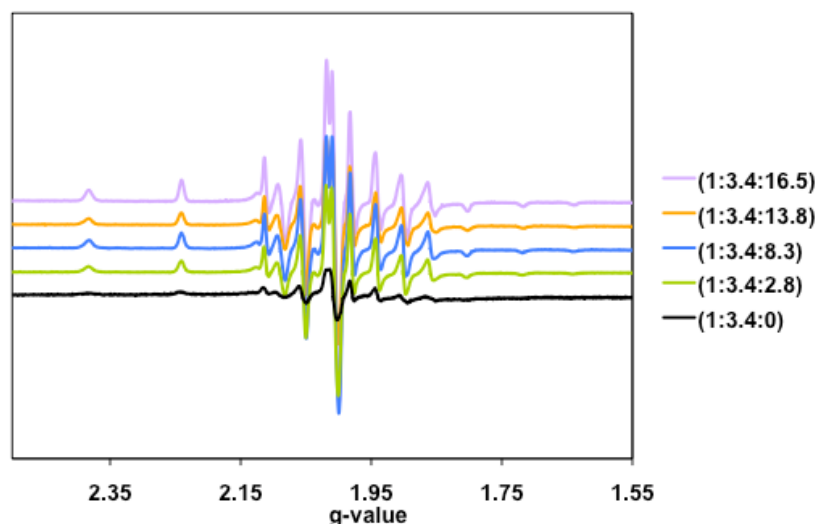

**Figure ESI4-1** – First derivative X-band EPR spectra of solutions containing 0.630  $\mu$ M of HSA, HSA: $V^{IV}O$  = 1:3.4 and upon progressively adding maltol (0 to 16.5 mol equivalents). The spectrum with (1:3.4:0) molar ratio was measured with a gain of  $6.3 \times 10^4$  and all other spectra with a slightly lower gain:  $2.5 \times 10^4$ .

Figure ESI4-2 shows the CD spectra obtained after stepwise additions of Gly-L-His to a solution containing  $V^{IV}O$  and maltol in a 1:2 molar ratio at pH=7.4. The resulting spectra are very similar to those obtained for solutions containing HSA instead of Gly-L-His (see e.g. Fig. ESI4-4), suggesting coordination of the metal complex to HSA by an imidazole N donor of a His residue. It is possible that the  $O_{amide}$  from the neighboring Gly residue also binds to  $V^{IV}$ . The EPR spectra shown in Fig ESI5-3 also corroborate this assumption since the main EPR-active species in the Gly-L-His system presents hyperfine parameters similar to those obtained in the HSA- $V^{IV}O$  system.

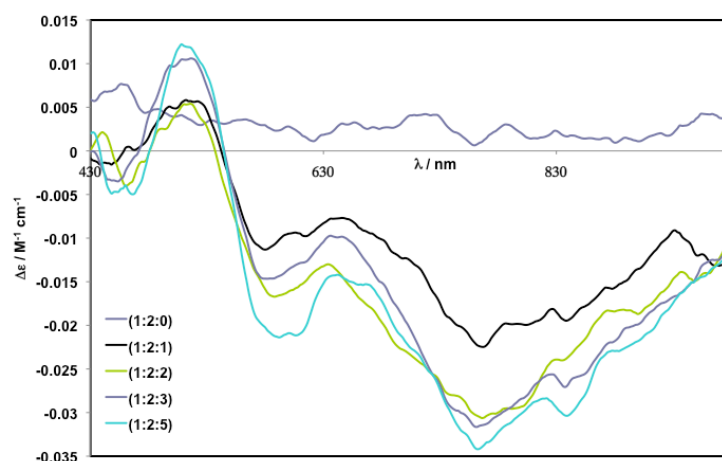

**Figure ESI4-2** - CD spectra in the visible range of solutions containing  $V^{IV}O$  : maltol (1:2) and upon stepwise additions of Gly-L-His in HEPES-S buffer pH of 7.4.  $C_{VO} = 3$  mM and the molar ratios are indicated in the figure.

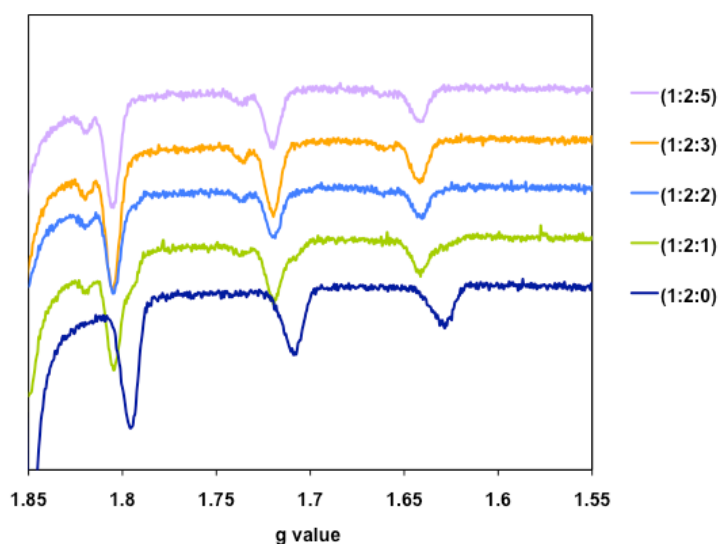

**Figure ESI4-3** – High region of the X-band EPR spectra of the system  $V^{IV}O$  : maltol : Gly-His in HEPES-S buffer pH of 7.4.  $C_{VO} = 3$  mM and the molar ratios are indicated in the figure.

If to solutions containing HSA at pH 7.4 maltol is added, no CD spectra is recorded for  $\lambda > 370$  nm. Stepwise additions of:

- maltol to solutions containing HSA and  $V^{IV}OSO_4$  or  $V^{IV}O(CIO_4)_2$
- solutions of  $V^{IV}OSO_4$  or  $V^{IV}O(CIO_4)_2$  and maltol to solutions of HSA

Yield similar CD spectra in the visible range. Figure ESI4-2 depicts results of one such experiment.



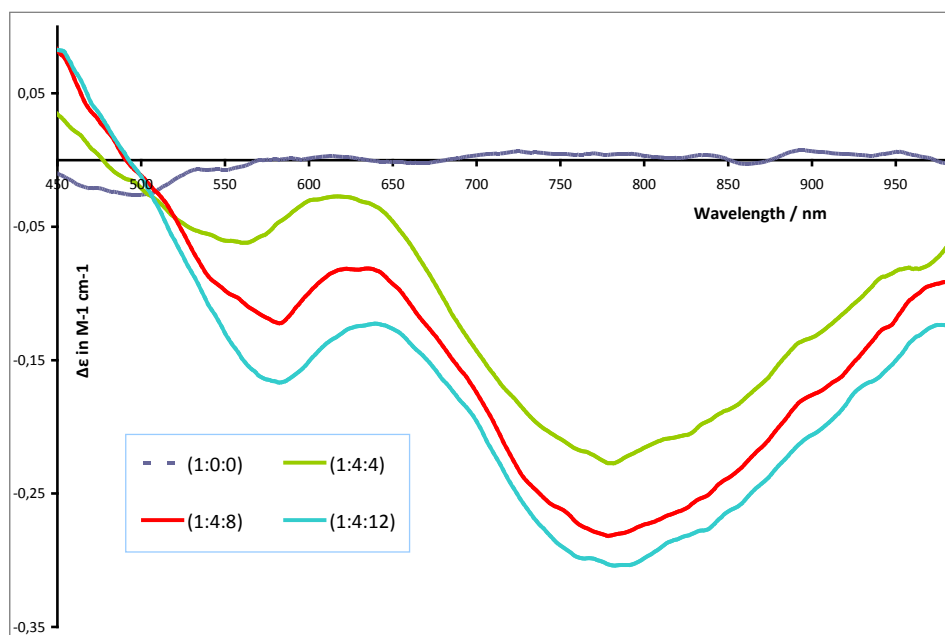

**Figure ESI4-4** - CD spectra in the visible range of solutions containing HSA (630  $\mu\text{M}$ ) and upon stepwise additions of a solutions containing  $\text{V}^{\text{IV}}\text{O}$  and maltol in HEPES-S buffer pH of 7.4. The molar ratios are indicated in the figure.

The CD spectra depicted in Fig. ESI4-4 differ from those of solutions containing HSA and  $\text{V}^{\text{IV}}\text{O}$ , thus confirming the distinct nature of the  $\text{V}^{\text{IV}}\text{O}$  binding modes to HSA when maltol is present.

## ESI5 – RT EPR measurements

ESI5-1 – The interaction of HSA with  $V^{IV}O$  studied by RT EPR

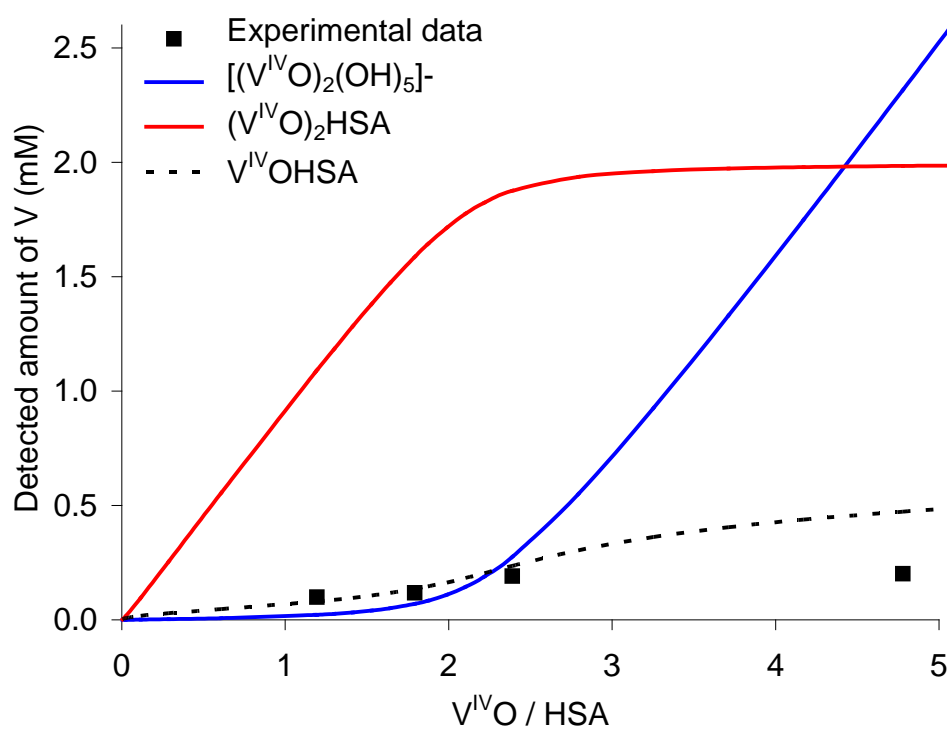

**ESI5-1** Comparison of the detected (quantitative RT EPR) amount of  $V^{IV}O$  with the speciation in the  $V^{IV}O : HSA$  (fatted) system ( $c(HSA) = 1\text{mM}$ )

ESI5-2 – The interaction of HSA with  $V^{IV}O(mal)_2$  studied by RT EPR

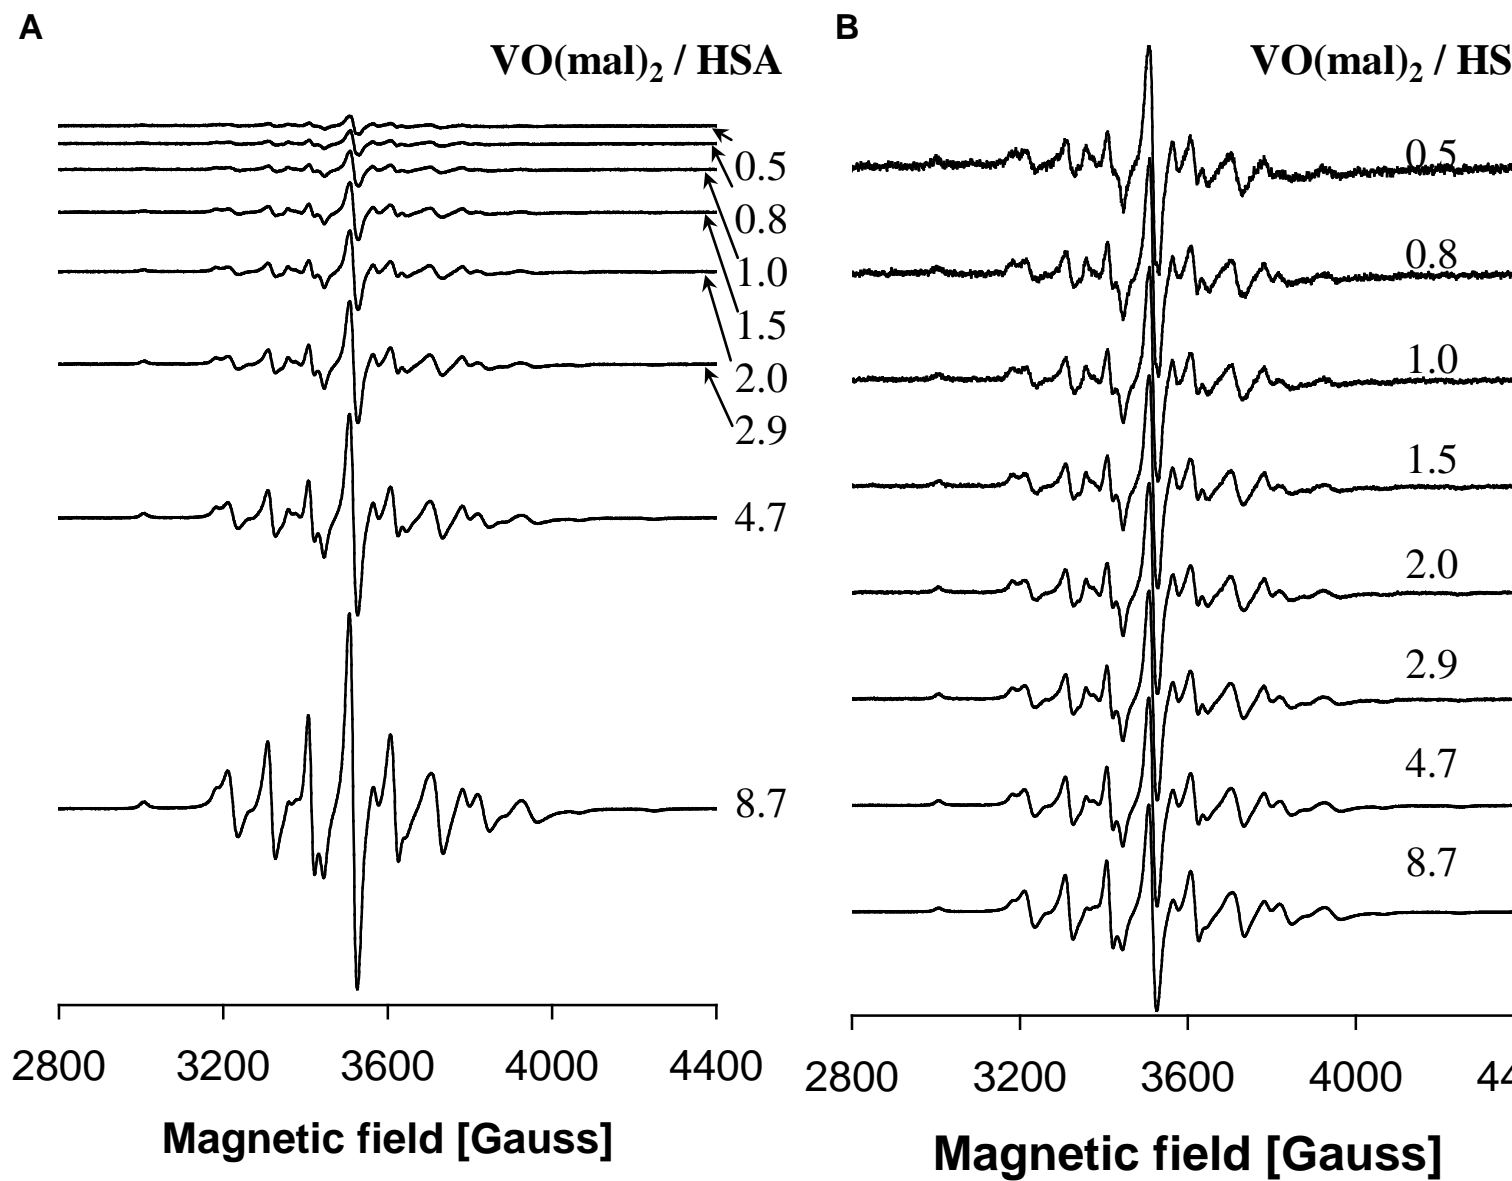

**Fig ESI5-2** The measured RT EPR spectra of HSA (1mM) titrated with  $V^{IV}O(mal)_2$ , the  $V^{IV}O(mal)_2$  : HSA ratios indicated on the figures. **A** Spectra with original amplitude **B**: Normalized spectra

ESI5-3 – Fitting of the titration of HSA with  $V^{IV}O(mal)_2$

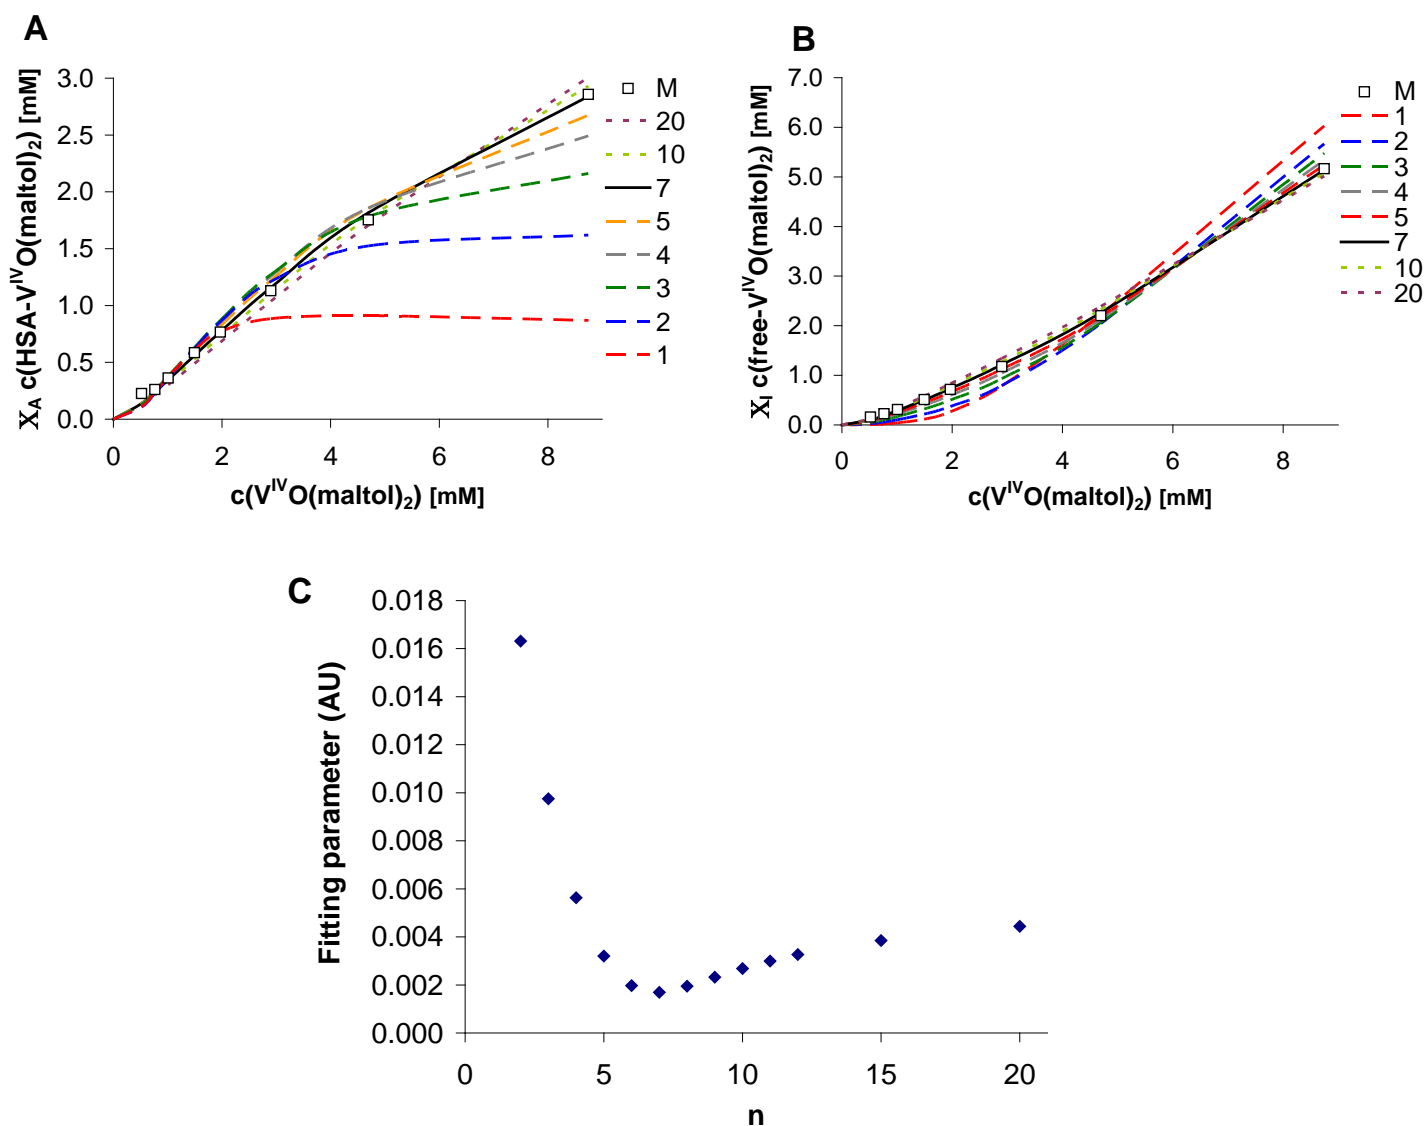

**Fig ESI5-3** The determined concentration of the HSA bounded  $V^{IV}O$  (axial type spectra, **A**) and the HSA unbounded  $V^{IV}O$  (isoropic type spectra, **B**) were fitted with the assumption of different number of equivalent binding site ( $n$ ). The measured points (M) indicated with  $\square$ . The determined fitting parameter in the function of  $n$  can be seen in **C**.
